# Supplementary material for: Development and Validation of a Novel Recurrence Risk Stratification for Initial Non-Muscle Invasive Bladder Cancer in the Han Chinese Population
Source: PubMed Central journal article supplement (PMC7052852; doi:10.7150/jca.38649), 2020-01-14
Supplement: jcav11p1668s1.pdf [file jcav11p1668s1.pdf]

**Table S1.** EORTC risk group stratification of recurrence

| Risk group stratification | Risk factor                                                                                                                                                                                                                          |
|---------------------------|--------------------------------------------------------------------------------------------------------------------------------------------------------------------------------------------------------------------------------------|
| Low-risk tumours          | Primary, solitary, Ta, LG/G1, <3 cm, no CIS                                                                                                                                                                                          |
| Intermediate-risk tumours | All tumours not defined in the two adjacent categories (between the category of low and high risk)                                                                                                                                   |
| High-risk tumours         | Any of the following:<br><ol style="list-style-type: none"><li>1. T1 tumour</li><li>2. HG/G3 tumour</li><li>3. CIS</li><li>4. Multiple and large (&gt;3 cm) Ta G1G2 tumours</li></ol> (all conditions must be present in this point) |

CIS: carcinoma *in situ*; HG: high grade; LG: low grade.

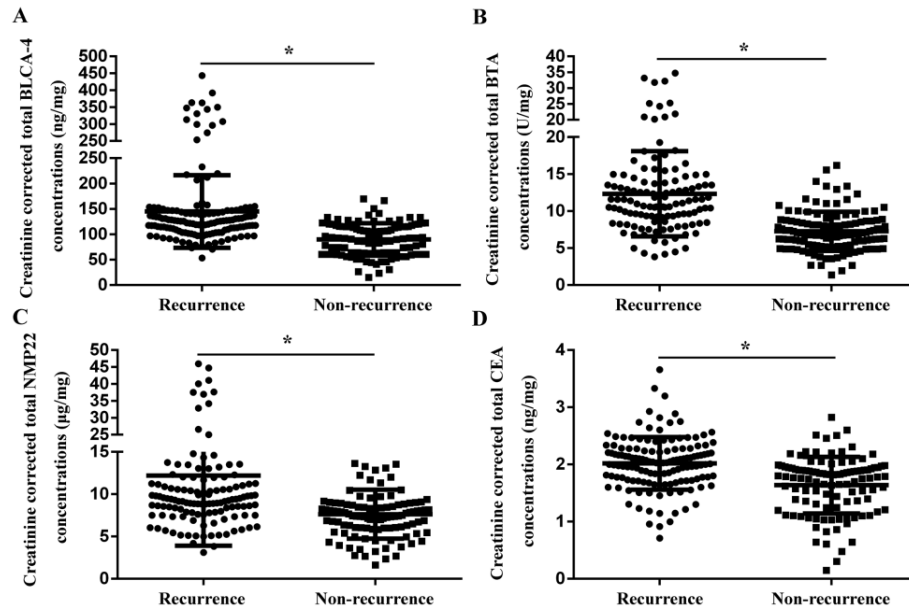

**Fig. S1** Creatinine-corrected total urinary biomarker concentrations in the recurrence group and the non-recurrence group (validation group). (A) BLCA-4. (B) BTA. (C) NMP22. (D) CEA. \*  $P < 0.05$ .
